# Supplementary material for: Gene expression profiling of patient‐derived pancreatic cancer xenografts predicts sensitivity to the BET bromodomain inhibitor JQ1: implications for individualized medicine efforts
Source: PubMed Central journal article supplement (PMC5376755; doi:10.15252/emmm.201606975), 2017-03-08

Figure 4A,B,C chemograms

| JC1 Concentration (µM) | (CRCM17) |      |       | (CRCM18) |      |      | (CRCM19) |      |      | (CRCM10) |      |      | (CRCM05) |      |      | (CRCM10) |      |      | (CRCM11) |      |      | (CRCM109) |      |      |     |      |      |
|------------------------|----------|------|-------|----------|------|------|----------|------|------|----------|------|------|----------|------|------|----------|------|------|----------|------|------|-----------|------|------|-----|------|------|
|                        | Mean     | SD   | N     | Mean     | SD   | N    | Mean     | SD   | N    | Mean     | SD   | N    | Mean     | SD   | N    | Mean     | SD   | N    | Mean     | SD   | N    | Mean      | SD   | N    |     |      |      |
| 0.000                  | 0        | 100  | 10,82 | 3        | 100  | 7,64 | 3        | 100  | 7,89 | 3        | 100  | 1,36 | 3        | 100  | 5,71 | 3        | 100  | 9,76 | 3        | 100  | 9,32 | 3         | 100  | 9,08 | 3   |      |      |
| 0.001                  | 90       | 4,48 | 3     | 101      | 7,02 | 3    | 100      | 4,18 | 3    | 89       | 4,9  | 3    | 98       | 5,86 | 3    | 99       | 1,02 | 3    | 101      | 7,02 | 3    | 97        | 6,86 | 3    | 97  | 6,86 |      |
| 0.003                  | 88       | 3,3  | 3     | 102      | 3,05 | 3    | 100      | 6,18 | 3    | 84       | 2,3  | 3    | 91       | 1,89 | 3    | 101      | 4,71 | 3    | 95       | 2,9  | 3    | 105       | 3,75 | 3    | 105 | 3,75 |      |
| 0.010                  | 82       | 3,85 | 3     | 102      | 2,26 | 3    | 98       | 7,49 | 3    | 84       | 4,77 | 3    | 93       | 1,06 | 3    | 99       | 1,52 | 3    | 95       | 5,06 | 3    | 100       | 1,46 | 3    | 100 | 1,46 |      |
| 0.030                  | 82       | 2,16 | 3     | 101      | 3,64 | 3    | 96       | 9,41 | 3    | 86       | 0,41 | 3    | 93       | 3,09 | 3    | 101      | 1,71 | 3    | 94       | 3,74 | 3    | 104       | 2,41 | 3    | 104 | 2,41 |      |
| 0.100                  | 0,1      | 79   | 2,57  | 3        | 98   | 7,94 | 3        | 91   | 3,83 | 3        | 77   | 1,4  | 3        | 89   | 0,96 | 3        | 100  | 4,68 | 3        | 91   | 3,57 | 3         | 97   | 3,51 | 3   | 97   | 3,51 |
| 0.300                  | 0,3      | 74   | 2,55  | 3        | 76   | 0,58 | 3        | 78   | 4,38 | 3        | 71   | 1,25 | 3        | 83   | 3,13 | 3        | 92   | 3,53 | 3        | 83   | 0,89 | 3         | 89   | 1,38 | 3   | 89   | 1,38 |
| 1.000                  | 1        | 60   | 0,53  | 3        | 51   | 3,87 | 3        | 55   | 0,43 | 3        | 52   | 1,02 | 3        | 70   | 1,59 | 3        | 86   | 0,59 | 3        | 69   | 2,1  | 3         | 63   | 5,76 | 3   | 63   | 5,76 |
| 3.000                  | 3        | 51   | 0,38  | 3        | 29   | 1,08 | 3        | 38   | 0,79 | 3        | 42   | 1,14 | 3        | 81   | 1,41 | 3        | 78   | 0,42 | 3        | 59   | 2,1  | 3         | 68   | 1,52 | 3   | 68   | 1,52 |
| 10.000                 | 10       | 44   | 1,16  | 3        | 21   | 0,21 | 3        | 24   | 0,34 | 3        | 32   | 0,69 | 3        | 55   | 0,11 | 3        | 70   | 2,28 | 3        | 59   | 1,39 | 3         | 64   | 3,03 | 3   | 64   | 3,03 |
| 30.000                 | 30       | 37   | 0,38  | 3        | 14   | 0,09 | 3        | 12   | 0,13 | 3        | 23   | 0,47 | 3        | 50   | 0,81 | 3        | 65   | 1,38 | 3        | 55   | 0,67 | 3         | 48   | 0,65 | 3   | 48   | 0,65 |

Figure 4D spheroids assay

| MYC low  |          | MYC high |          |
|----------|----------|----------|----------|
| DMSO     | JC1 (µM) | DMSO     | JC1 (µM) |
| 95,83076 | 98,67564 | 85,33524 | 65,7205  |
| 100,2606 | 66,09727 | 83,43211 | 51,31942 |
| 84,67812 | 75,6963  | 102,245  | 49,91787 |
| 88,29445 | 75,83363 | 109,2216 | 53,19562 |
| 86,40707 | 77,73877 | 126,8207 | 56,25889 |
| 124,1086 | 105,6998 | 105,2222 | 55,52087 |
| 100,7308 | 86,32214 | 119,2664 | 47,15796 |
| 88,92326 | 69,94681 | 103,4209 | 64,49735 |
| 95,83076 | 956      | 85,33524 | 33,74336 |
| 81,12198 | 67,34264 | 129,6242 | 32,83791 |
| 75,30049 | 56,34384 | 132,5938 | 33,80598 |
| 86,00465 | 59,71405 | 106,4214 | 40,19901 |
| 91,30586 | 52,48368 | 121,864  | 45,27991 |
| 110,8888 | 46,46173 | 113,1813 | 43,87851 |
| 107,812  | 71,49242 | 95,83772 | 42,53554 |
| 90,41254 | 68,27897 | 91,92812 | 41,73729 |
| 86,83076 | 60,79473 | 85,33524 | 39,50705 |
| 95,02122 | 60,61835 | 92,11407 | 37,36454 |
| 114,7981 | 81,55502 | 88,18807 | 45,50872 |
| 124,5452 | 81,39976 | 70,98103 | 50,30296 |
| 136,7758 | 120,611  | 84,74858 | 49,97701 |
| 126,3071 | 86,24461 | 83,49    | 36,30051 |
| 137,7167 | 78,62412 | 101,0047 | 46,10214 |
| 76,13335 | 89,24203 | 94,98939 | 33,88827 |

Figure 4E densitometry Western blot

| DMSO    | MYCActin   |            | normalisation DMSO = 1 |            |
|---------|------------|------------|------------------------|------------|
|         | 0,73548794 | 0,73028444 | 1                      | 1          |
| 100 nM  | 0,4930771  | 0,4775966  | 0,6694934              | 0,6496414  |
| 250 nM  | 0,5038586  | 0,4965425  | 0,6839878              | 0,6800829  |
| 500 nM  | 0,3372848  | 0,3180223  | 0,4579533              | 0,4501919  |
| 1000 nM | 0,2955573  | 0,2868861  | 0,4039674              | 0,39281764 |
| 2000 nM | 0,21431798 | 0,20733268 | 0,29100002             | 0,28390675 |
| DMSO    | P27Actin   |            | normalisation DMSO = 1 |            |
| 100 nM  | 0,34180971 | 0,33964859 | 1                      | 1          |
| 250 nM  | 0,3779941  | 0,37749772 | 1,0588123              | 1,11145615 |
| 500 nM  | 0,3901177  | 0,3937887  | 1,15730701             | 1,14615997 |
| 1000 nM | 0,5422749  | 0,55724952 | 1,64499396             | 1,64066489 |
| 2000 nM | 0,69527442 | 0,6913709  | 2,03409796             | 2,03030591 |
| DMSO    | CASpActin  |            | normalisation DMSO = 1 |            |
| 100 nM  | 0,04057755 | 0,04590744 | 1                      | 1          |
| 250 nM  | 0,11034718 | 0,10614516 | 2,22575792             | 2,31215588 |
| 500 nM  | 0,12338484 | 0,1180509  | 2,48873404             | 2,37491959 |
| 1000 nM | 0,3824577  | 0,37760744 | 7,7149315              | 8,22671536 |
| 2000 nM | 1,09666435 | 1,0935521  | 22,1202687             | 23,8208032 |
| 3000 nM | 1,34567988 | 1,3285627  | 27,1430688             | 26,9480861 |

Figure 4. E : source data for western blots

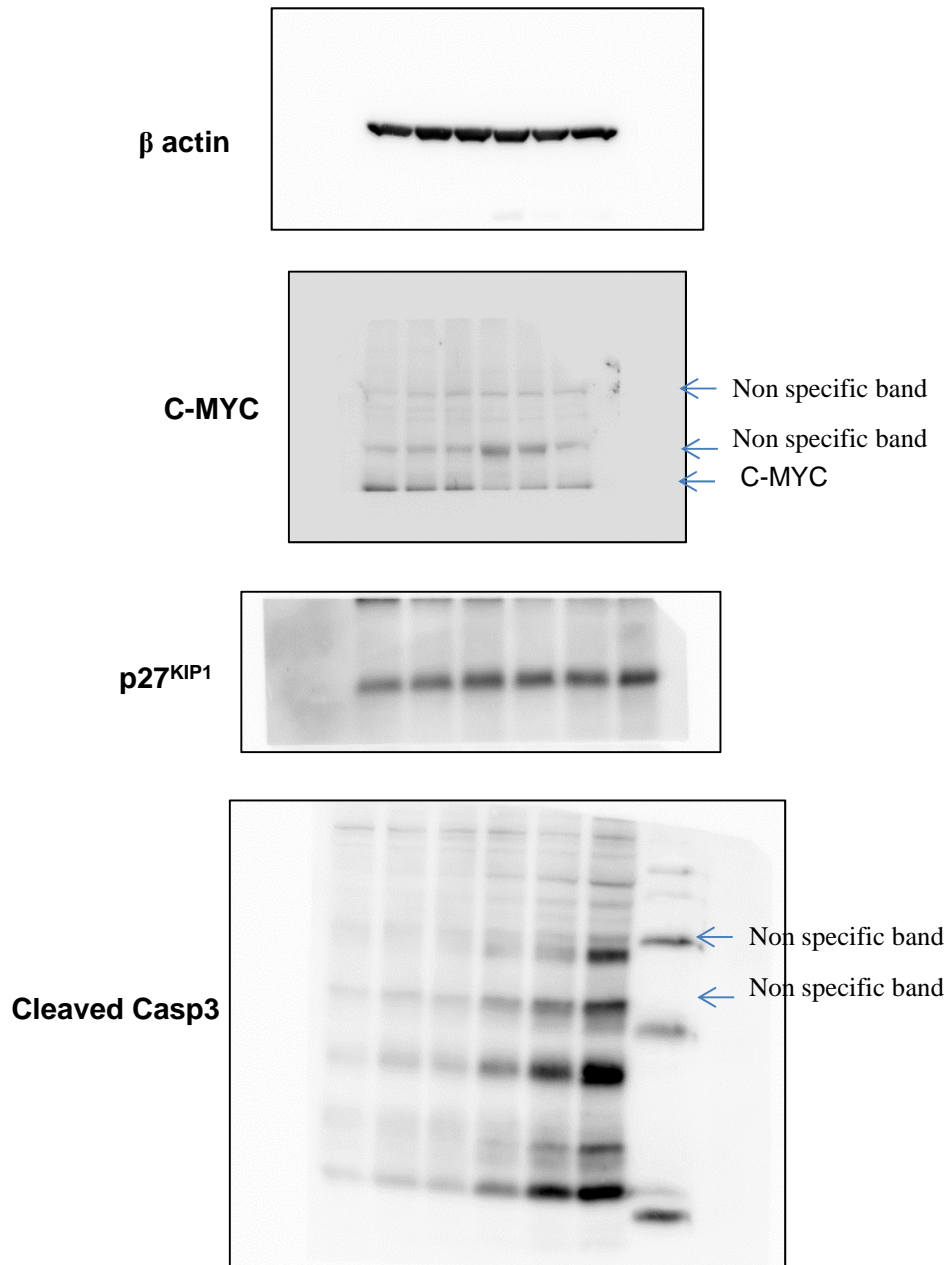

Supplement: EMMM-9-482-s012.pdf [file EMMM-9-482-s012.pdf]
