# Supplementary material for: Gene expression profiling of patient‐derived pancreatic cancer xenografts predicts sensitivity to the BET bromodomain inhibitor JQ1: implications for individualized medicine efforts
Source: PubMed Central journal article supplement (PMC5376755; doi:10.15252/emmm.201606975), 2017-03-08
Supplement: EMMM-9-482-s010.pdf [file EMMM-9-482-s010.pdf]

Table with columns: gene, chr, start, end, strand, and values for various conditions (e.g., chr1, chr2, chr3, etc.).

Table with columns: gene, chr, start, end, strand, and values for various conditions (e.g., chr1, chr2, chr3, etc.).

Table with columns: gene, chr, start, end, strand, and values for various conditions (e.g., chr1, chr2, chr3, etc.).

Table with columns: gene, chr, start, end, strand, and values for various conditions (e.g., chr1, chr2, chr3, etc.).

Table with columns: gene, chr, start, end, strand, and values for various conditions (e.g., chr1, chr2, chr3, etc.).

Table with columns: gene, chr, start, end, strand, and values for various conditions (e.g., chr1, chr2, chr3, etc.).

Table with columns: gene, chr, start, end, strand, and values for various conditions (e.g., chr1, chr2, chr3, etc.).

Table with columns: gene, chr, start, end, strand, and values for various conditions (e.g., chr1, chr2, chr3, etc.).

Table with columns: gene, chr, start, end, strand, and values for various conditions (e.g., chr1, chr2, chr3, etc.).

Table with columns: gene, chr, start, end, strand, and values for various conditions (e.g., chr1, chr2, chr3, etc.).
