# Supplementary material for: Gene expression profiling of patient‐derived pancreatic cancer xenografts predicts sensitivity to the BET bromodomain inhibitor JQ1: implications for individualized medicine efforts
Source: EMBO Mol Med. 2017 Mar 8;9(4):482–97. doi: 10.15252/emmm.201606975 (PMC5376755; doi:10.15252/emmm.201606975)
Supplement: Supplementary file 12 — Source Data for Figure 3 [file EMMM-9-482-s011.pdf]

Figure 3A

| MTC high  | MTC low    |
|-----------|------------|
| 13.02271  | 0.577884   |
| 10.00006  | 0.400209   |
| 17.13303  | 0.502164   |
| 8.23007   | 0.474481   |
| 86.84003  | 0.303263   |
| 15.40246  | 0.480001   |
| 7.80079   | 0.532344   |
| 6.62076   | 0.422852   |
| 10.39196  | 0.334451   |
| 5.58035   | 0.400594   |
| 5.4807462 | 0.387711   |
| 8.23042   | 0.460270   |
| 10.7236   | 0.401945   |
| 8.88089   | 0.390430   |
| 14.05884  | 0.302182   |
| 7.58713   | 0.384971   |
| 71.23477  | 0.352445   |
| 12.51381  | 0.420547   |
| 10.07975  | 0.400506   |
| 12.64819  | 0.380005   |
| 19.84722  | 0.348108   |
| 10.00006  | 0.300203   |
| 100.4405  | 0.302774   |
| 17.28008  | 0.440404   |
| 12.24965  | 0.400203   |
| 10.29163  | 0.390495   |
| 16.14006  | 0.340002   |
| 8.80063   | 0.380208   |
| 87.12973  | 0.393208   |
| 14.30003  | 0.420771   |
| 6.30007   | 0.714585   |
| 8.03029   | 0.570709   |
| 12.61407  | 0.448186   |
| 63.40027  | 0.320808   |
| 11.20448  | 0.440700   |
| 8.811168  | 0.350174   |
| 8.21945   | 0.471295   |
| 12.81771  | 0.312545   |
| 8.94083   | 0.470782   |
| 68.21734  | 0.370264   |
| 11.40081  | 0.400212   |
| 12.84037  | 0.324468   |
| 10.10104  | 0.440404   |
| 16.40008  | 0.330187   |
| 8.877104  | 0.418132   |
| 85.41113  | 0.380404   |
| 14.80009  | 0.470421   |
| 16.80084  | 0.3308     |
| 14.80081  | 0.430491   |
| 22.12771  | 0.332347   |
| 11.80077  | 0.471203   |
| 11.1106   | 0.380118   |
| 10.80015  | 0.460793   |
| 8.87046   | 0.460793   |
| 17.40005  | 0.370734   |
| 11.80026  | 0.320973   |
| 8.77083   | 0.370287   |
| 58.0415   | 0.340807   |
| 10.30005  | 0.421462   |
| 11.24043  | 0.23080215 |
| 3.50769   | 0.370741   |
| 3.50747   | 0.391283   |
| 2.58086   | 0.370741   |
| 15.24086  | 0.270805   |
| 5.80737   | 0.302182   |
| 11.81111  | 0.260208   |
| 7.75216   | 0.42004    |
| 3.440213  | 0.310401   |
| 7.77012   | 0.370782   |
| 1.30764   | 1.10074    |
| 6.10715   | 0.370782   |
| 5.80719   | 0.220808   |
| 2.05046   | 0.302988   |
| 2.79084   | 0.320162   |
| 2.20262   | 0.304203   |
| 13.00081  | 0.304026   |
| 5.07198   | 0.304026   |
| 8.84277   | 0.211801   |
| 2.98011   | 0.302182   |
| 2.98011   | 0.302182   |
| 3.440213  | 0.310401   |
| 7.77012   | 0.370782   |
| 1.30764   | 1.10074    |
| 6.10715   | 0.370782   |
| 5.80719   | 0.220808   |
| 2.05046   | 0.302988   |
| 2.79084   | 0.320162   |
| 2.20262   | 0.304203   |
| 13.00081  | 0.304026   |
| 5.07198   | 0.304026   |
| 8.84277   | 0.211801   |
| 2.98011   | 0.302182   |
| 2.98011   | 0.302182   |
| 3.440213  | 0.310401   |
| 7.77012   | 0.370782   |
| 1.30764   | 1.10074    |
| 6.10715   | 0.370782   |
| 5.80719   | 0.220808   |
| 2.05046   | 0.302988   |
| 2.79084   | 0.320162   |
| 2.20262   | 0.304203   |
| 13.00081  | 0.304026   |
| 5.07198   | 0.304026   |
| 8.84277   | 0.211801   |
| 2.98011   | 0.302182   |
| 2.98011   | 0.302182   |
| 3.440213  | 0.310401   |
| 7.77012   | 0.370782   |
| 1.30764   | 1.10074    |
| 6.10715   | 0.370782   |
| 5.80719   | 0.220808   |
| 2.05046   | 0.302988   |
| 2.79084   | 0.320162   |
| 2.20262   | 0.304203   |
| 13.00081  | 0.304026   |
| 5.07198   | 0.304026   |
| 8.84277   | 0.211801   |
| 2.98011   | 0.302182   |
| 2.98011   | 0.302182   |
| 3.440213  | 0.310401   |
| 7.77012   | 0.370782   |
| 1.30764   | 1.10074    |
| 6.10715   | 0.370782   |
| 5.80719   | 0.220808   |
| 2.05046   | 0.302988   |
| 2.79084   | 0.320162   |
| 2.20262   | 0.304203   |
| 13.00081  | 0.304026   |
| 5.07198   | 0.304026   |
| 8.84277   | 0.211801   |
| 2.98011   | 0.302182   |
| 2.98011   | 0.302182   |
| 3.440213  | 0.310401   |
| 7.77012   | 0.370782   |
| 1.30764   | 1.10074    |
| 6.10715   | 0.370782   |
| 5.80719   | 0.220808   |
| 2.05046   | 0.302988   |
| 2.79084   | 0.320162   |
| 2.20262   | 0.304203   |
| 13.00081  | 0.304026   |
| 5.07198   | 0.304026   |
| 8.84277   | 0.211801   |
| 2.98011   | 0.302182   |
| 2.98011   | 0.302182   |
| 3.440213  | 0.310401   |
| 7.77012   | 0.370782   |
| 1.30764   | 1.10074    |
| 6.10715   | 0.370782   |
| 5.80719   | 0.220808   |
| 2.05046   | 0.302988   |
| 2.79084   | 0.320162   |
| 2.20262   | 0.304203   |
| 13.00081  | 0.304026   |
| 5.07198   | 0.304026   |
| 8.84277   | 0.211801   |
| 2.98011   | 0.302182   |
| 2.98011   | 0.302182   |
| 3.440213  | 0.310401   |
| 7.77012   | 0.370782   |
| 1.30764   | 1.10074    |
| 6.10715   | 0.370782   |
| 5.80719   | 0.220808   |
| 2.05046   | 0.302988   |
| 2.79084   | 0.320162   |
| 2.20262   | 0.304203   |
| 13.00081  | 0.304026   |
| 5.07198   | 0.304026   |
| 8.84277   | 0.211801   |
| 2.98011   | 0.302182   |
| 2.98011   | 0.302182   |
| 3.440213  | 0.310401   |
| 7.77012   | 0.370782   |
| 1.30764   | 1.10074    |
| 6.10715   | 0.370782   |
| 5.80719   | 0.220808   |
| 2.05046   | 0.302988   |
| 2.79084   | 0.320162   |
| 2.20262   | 0.304203   |
| 13.00081  | 0.304026   |
| 5.07198   | 0.304026   |
| 8.84277   | 0.211801   |
| 2.98011   | 0.302182   |
| 2.98011   | 0.302182   |
| 3.440213  | 0.310401   |
| 7.77012   | 0.370782   |
| 1.30764   | 1.10074    |
| 6.10715   | 0.370782   |
| 5.80719   | 0.220808   |
| 2.05046   | 0.302988   |
| 2.79084   | 0.320162   |
| 2.20262   | 0.304203   |
| 13.00081  | 0.304026   |
| 5.07198   | 0.304026   |
| 8.84277   | 0.211801   |
| 2.98011   | 0.302182   |
| 2.98011   | 0.302182   |
| 3.440213  | 0.310401   |
| 7.77012   | 0.370782   |
| 1.30764   | 1.10074    |
| 6.10715   | 0.370782   |
| 5.80719   | 0.220808   |
| 2.05046   | 0.302988   |
| 2.79084   | 0.320162   |
| 2.20262   | 0.304203   |
| 13.00081  | 0.304026   |
| 5.07198   | 0.304026   |
| 8.84277   | 0.211801   |
| 2.98011   | 0.302182   |
| 2.98011   | 0.302182   |
| 3.440213  | 0.310401   |
| 7.77012   | 0.370782   |
| 1.30764   | 1.10074    |
| 6.10715   | 0.370782   |
| 5.80719   | 0.220808   |
| 2.05046   | 0.302988   |
| 2.79084   | 0.320162   |
| 2.20262   | 0.304203   |
| 13.00081  | 0.304026   |
| 5.07198   | 0.304026   |
| 8.84277   | 0.211801   |
| 2.98011   | 0.302182   |
| 2.98011   | 0.302182   |
| 3.440213  | 0.310401   |
| 7.77012   | 0.370782   |
| 1.30764   | 1.10074    |
| 6.10715   | 0.370782   |
| 5.80719   | 0.220808   |
| 2.05046   | 0.302988   |
| 2.79084   | 0.320162   |
| 2.20262   | 0.304203   |
| 13.00081  | 0.304026   |
| 5.07198   | 0.304026   |
| 8.84277   | 0.211801   |
| 2.98011   | 0.302182   |
| 2.98011   | 0.302182   |
| 3.440213  | 0.310401   |
| 7.77012   | 0.370782   |
| 1.30764   | 1.10074    |
| 6.10715   | 0.370782   |
| 5.80719   | 0.220808   |
| 2.05046   | 0.302988   |
| 2.79084   | 0.320162   |
| 2.20262   | 0.304203   |
| 13.00081  | 0.304026   |
| 5.07198   | 0.304026   |
| 8.84277   | 0.211801   |
| 2.98011   | 0.302182   |
| 2.98011   | 0.302182   |
| 3.440213  | 0.310401   |
| 7.77012   | 0.370782   |
| 1.30764   | 1.10074    |
| 6.10715   | 0.370782   |
| 5.80719   | 0.220808   |
| 2.05046   | 0.302988   |
| 2.79084   | 0.320162   |
| 2.20262   | 0.304203   |
| 13.00081  | 0.304026   |
| 5.07198   | 0.304026   |
| 8.84277   | 0.211801   |
| 2.98011   | 0.302182   |
| 2.98011   | 0.302182   |
| 3.440213  | 0.310401   |
| 7.77012   | 0.370782   |
| 1.30764   | 1.10074    |
| 6.10715   | 0.370782   |
| 5.80719   | 0.220808   |
| 2.05046   | 0.302988   |
| 2.79084   | 0.320162   |
| 2.20262   | 0.304203   |
| 13.00081  | 0.304026   |
| 5.07198   | 0.304026   |
| 8.84277   | 0.211801   |
| 2.98011   | 0.302182   |
| 2.98011   | 0.302182   |
| 3.440213  | 0.310401   |
| 7.77012   | 0.370782   |
| 1.30764   | 1.10074    |
| 6.10715   | 0.370782   |
| 5.80719   | 0.220808   |
| 2.05046   | 0.302988   |
| 2.79084   | 0.320162   |
| 2.20262   | 0.304203   |
| 13.00081  | 0.304026   |
| 5.07198   | 0.304026   |
| 8.84277   | 0.211801   |
| 2.98011   | 0.302182   |
| 2.98011   | 0.302182   |
| 3.440213  | 0.310401   |
| 7.77012   | 0.370782   |
| 1.30764   | 1.10074    |
| 6.10715   | 0.370782   |
| 5.80719   | 0.220808   |
| 2.05046   | 0.302988   |
| 2.79084   | 0.320162   |
| 2.20262   | 0.304203   |
| 13.00081  | 0.304026   |
| 5.07198   | 0.304026   |
| 8.84277   | 0.211801   |
| 2.98011   | 0.302182   |
| 2.98011   | 0.302182   |
| 3.440213  | 0.310401   |
| 7.77012   | 0.370782   |
| 1.30764   | 1.10074    |
| 6.10715   | 0.370782   |
| 5.80719   | 0.220808   |
| 2.05046   | 0.302988   |
| 2.79084   | 0.320162   |
| 2.20262   | 0.304203   |
| 13.00081  | 0.304026   |
| 5.07198   | 0.304026   |
| 8.84277   | 0.211801   |
| 2.98011   | 0.302182   |
| 2.98011   | 0.302182   |
| 3.440213  | 0.310401   |
| 7.77012   | 0.370782   |
| 1.30764   | 1.10074    |
| 6.10715   | 0.370782   |
| 5.80719   | 0.220808   |
| 2.05046   | 0.302988   |
| 2.79084   | 0.320162   |
| 2.20262   | 0.304203   |
| 13.00081  | 0.304026   |
| 5.07198   | 0.304026   |
| 8.84277   | 0.211801   |
| 2.98011   | 0.302182   |
| 2.98011   | 0.302182   |
| 3.440213  | 0.310401   |
| 7.77012   | 0.370782   |
| 1.30764   | 1.10074    |
| 6.10715   | 0.370782   |
| 5.80719   | 0.220808   |
| 2.05046   | 0.302988   |
| 2.79084   | 0.320162   |
| 2.20262   | 0.304203   |
| 13.00081  | 0.304026   |
| 5.07198   | 0.304026   |
| 8.84277   | 0.211801   |
| 2.98011   | 0.302182   |
| 2.98011   | 0.302182   |
| 3.440213  | 0.310401   |
| 7.77012   | 0.370782   |
| 1.30764   | 1.10074    |
| 6.10715   | 0.370782   |
| 5.80719   | 0.220808   |
| 2.05046   | 0.302988   |
| 2.79084   | 0.320162   |
| 2.20262   | 0.304203   |
| 13.00081  | 0.304026   |
| 5.07198   | 0.304026   |
| 8.84277   | 0.211801   |
| 2.98011   | 0.302182   |
| 2.98011   | 0.302182   |
| 3.440213  | 0.310401   |
| 7.77012   | 0.370782   |
| 1.30764   | 1.10074    |
| 6.10715   | 0.370782   |
| 5.80719   | 0.220808   |
| 2.05046   | 0.302988   |
| 2.79084   | 0.320162   |
| 2.20262   | 0.304203   |
| 13.00081  | 0.304026   |
| 5.07198   | 0.304026   |
| 8.84277   | 0.211801   |
| 2.98011   | 0.302182   |
| 2.98011   | 0.302182   |
| 3.440213  | 0.310401   |
| 7.77012   | 0.370782   |
| 1.30764   | 1.10074    |
| 6.10715   | 0.370782   |
| 5.80719   | 0.220808   |
| 2.05046   | 0.302988   |
| 2.79084   | 0.320162   |
| 2.20262   | 0.304203   |
| 13.00081  | 0.304026   |
| 5.07198   | 0.304026   |
| 8.84277   | 0.211801   |
| 2.98011   | 0.302182   |
| 2.98011   | 0.302182   |
| 3.440213  | 0.310401   |
| 7.77012   | 0.370782   |
| 1.30764   | 1.10074    |
| 6.10715   | 0.370782   |
| 5.80719   | 0.220808   |
| 2.05046   | 0.302988   |
| 2.79084   | 0.320162   |
| 2.20262   | 0.304203   |
| 13.00081  | 0.304026   |
| 5.07198   | 0.304026   |
| 8.84277   | 0.211801   |
| 2.98011   | 0.302182   |
| 2.98011   | 0.302182   |
| 3.440213  | 0.310401   |
| 7.77012   | 0.370782   |
| 1.30764   | 1.10074    |
| 6.10715   | 0.370782   |
| 5.80719   | 0.220808   |
| 2.05046   | 0.302988   |
| 2.79084   | 0.320162   |
| 2.20262   | 0.304203   |
| 13.00081  | 0.304026   |
| 5.07198   | 0.304026   |
| 8.84277   | 0.211801   |
| 2.98011   | 0.302182   |
| 2.98011   | 0.302182   |
| 3.440213  | 0.310401   |
| 7.77012   | 0.370782   |
| 1.30764   | 1.10074    |
